# Supplementary material
Source: publisher figshare collection journal article supplement (https://tandf.figshare.com/ndownloader/files/14527439)
Supplement: Supplementary file 1 [file 14527439]

## SUPPLEMENTARY MATERIAL

### Neo-debromoaplysiatoxin C, with new structural rearrangement, derived from debromoaplysiatoxin

Yang-Hua Tang <sup>a,b,f</sup>, Ting-Ting Liang <sup>b,c,f</sup>, Ting-Ting Fan <sup>b</sup>, Lawrence Jordan Keen <sup>b</sup>, Xiao-Dan Zhang <sup>b</sup>, Lin Xu <sup>b</sup>, Qi Zhao <sup>d</sup>, Rong Zeng <sup>a</sup>, Bing-Nan Han <sup>b,\*</sup>

<sup>a</sup> Department of Pharmacy, Graduate School, Hunan University of Chinese Medicine, Changsha 410208, People's Republic of China;

<sup>b</sup> Department of Development Technology of Marine Resources, College of Life Sciences, Zhejiang Sci-Tech University, Hangzhou 310018, People's Republic of China; <sup>c</sup>School of Chemical and Environmental Engineering, Shanghai Institute of Technology; Shanghai 201418, China; <sup>d</sup> Faculty of Health Sciences, University of Macau; Macau, China

### Abstract

Neo-debromoaplysiatoxin C (**1**), a new member of the aplysiatoxin family, was isolated from the marine cyanobacterium *Lyngbya* sp.. The structure of **1** was elucidated based on spectroscopic data, and its stereochemistry was determined from NOESY spectrum and biosynthetic considerations. This new compound presents an intriguing 10-membered lactone ring skeleton derived from debromoaplysiatoxin by structural rearrangement, which is the first example in the aplysiatoxin family. Its biological properties were evaluated for cytotoxicity, PKC $\delta$  activation and inhibitory effects on potassium channel.

**Keywords:** neo-debromoaplysiatoxin C; debromoaplysiatoxin; newly discovered structural frame; *Lyngbya* sp.

---

\* Corresponding author *E-mail*: hanbingnan@zstu.edu.cn (B.-N. Han)

<sup>f</sup> These authors equally contributed to this work.

## Table of Contents

| Contents.                                                                               | page |
|-----------------------------------------------------------------------------------------|------|
| <b>Figure S1.</b> Key COSY, HMBC and NOESY correlations of <b>1</b>                     | 3    |
| <b>Figure S2.</b> CD spectrum of <b>1</b>                                               | 3    |
| <b>Table S1.</b> Details NMR data of <b>1</b>                                           | 4    |
| <b>Figure S3.</b> $^1\text{H}$ NMR spectrum (600 MHz) of <b>1</b> in $\text{CDCl}_3$    | 5    |
| <b>Figure S4.</b> $^{13}\text{C}$ NMR spectrum (150 MHz) of <b>1</b> in $\text{CDCl}_3$ | 6    |
| <b>Figure S5.</b> DEPT NMR spectrum (150 MHz) of <b>1</b> in $\text{CDCl}_3$            | 7    |
| <b>Figure S6.</b> HSQC spectrum of <b>1</b> in $\text{CDCl}_3$                          | 8    |
| <b>Figure S7.</b> COSY spectrum of <b>1</b> in $\text{CDCl}_3$                          | 9    |
| <b>Figure S8.</b> HMBC spectrum of <b>1</b> in $\text{CDCl}_3$                          | 10   |
| <b>Figure S9.</b> NOESY spectrum of <b>1</b> in $\text{CDCl}_3$                         | 11   |
| <b>Figure S10.</b> HRESIMS of <b>1</b>                                                  | 12   |
| <b>Figure S11.</b> UV spectrum of <b>1</b>                                              | 13   |
| <b>Figure S12.</b> IR spectrum of <b>1</b>                                              | 14   |
| <b>Scheme S1.</b> Plausible biosynthetic pathway of <b>1</b>                            | 15   |
| <b>Figure S13.</b> Newman projections analysis for C11/C12 and C10/C11                  | 16   |

**Figure S1.** Key COSY, HMBC and NOESY correlations of **1**

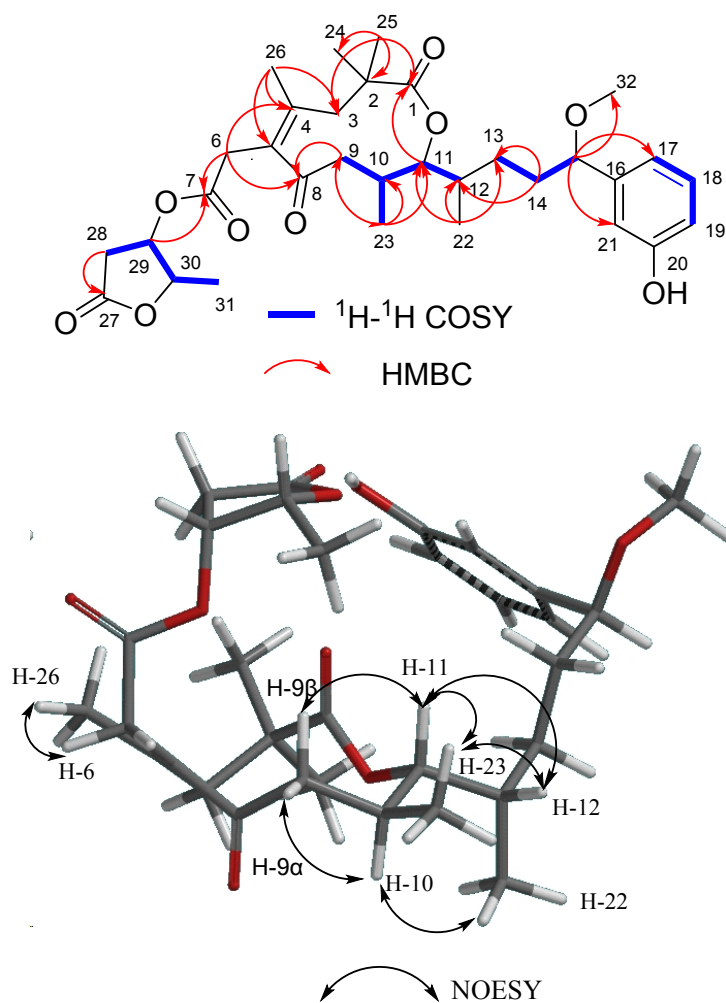

**Figure S2.** CD spectrum of **1** in MeOH

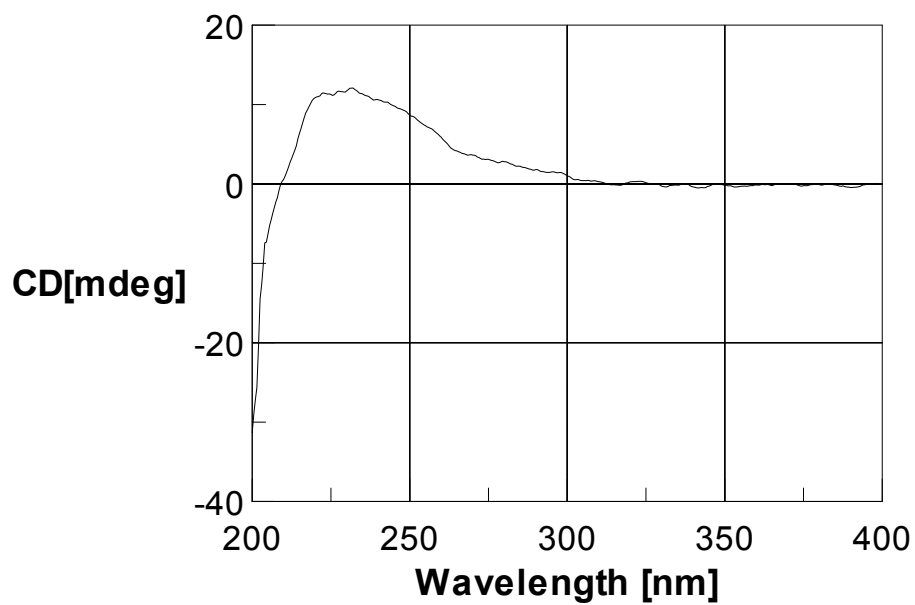

**Table S1**NMR data for Neo-debromoaplysiatoxin C (**1**) in CDCl<sub>3</sub>.

| NO.               | Neo-debromoaplysiatoxin C ( <b>1</b> ) |                                                  |                                 |                            |                      |
|-------------------|----------------------------------------|--------------------------------------------------|---------------------------------|----------------------------|----------------------|
|                   | $\delta_C$ , type <sup>a</sup>         | $\delta_H$ , mult ( <i>J</i> in Hz) <sup>b</sup> | COSY                            | HMBC                       | NOESY                |
| 1                 | 175.6, qC                              |                                                  |                                 |                            |                      |
| 2                 | 46.0, qC                               |                                                  |                                 |                            |                      |
| 3 $\alpha$        | 44.0, CH <sub>2</sub>                  | 3.38, d (13.2)                                   |                                 | C-1, 2, 4, 5, 24, 25, 26   | H-24                 |
| 3 $\beta$         |                                        | 1.66, d (13.2)                                   |                                 | C-1, 2, 4, 5, 24, 25, 26   | H-25                 |
| 4                 | 138.5, qC                              |                                                  |                                 |                            |                      |
| 5                 | 134.2, qC                              |                                                  |                                 |                            |                      |
| 6                 | 34.9, CH <sub>2</sub>                  | 3.18, overlap                                    |                                 | C-4, 5, 7, 8               | H-26                 |
| 7                 | 169.2, qC                              |                                                  |                                 |                            |                      |
| 8                 | 205.2, qC                              |                                                  |                                 |                            |                      |
| 9 $\alpha$        | 46.1, CH <sub>2</sub>                  | 2.12, dd (15.0, 1.0)                             | H-9 $\beta$                     | C-8, 10, 11, 23            | H-10                 |
| 9 $\beta$         |                                        | 2.51, dd (15.0, 11.2)                            | H-9 $\alpha$ , 10               | C-8, 10, 11                | H-11                 |
| 10                | 33.1, CH                               | 2.76, overlap                                    | H-9 $\beta$ , 11, 23            | C-23                       | H-9 $\alpha$ , 22    |
| 11                | 80.1, CH                               | 4.64, dd (10.8, 1.0)                             | H-10, 12                        | C-1, 9, 10, 12, 13, 22, 23 | H-9 $\beta$ , 12, 23 |
| 12                | 34.4, CH                               | 1.64, m                                          | H-11                            | C-13, 22                   | H-11, 23             |
| 13 $\alpha$       | 30.3, CH <sub>2</sub>                  | 1.15, m                                          | H-13 $\beta$ , 14,              |                            |                      |
| 13 $\beta$        |                                        | 0.92, overlap                                    | H-13 $\alpha$ , 14              |                            |                      |
| 14                | 35.7, CH <sub>2</sub>                  | 1.74, m                                          | H-13 $\alpha$ , 13 $\beta$ , 15 | C-12, 13, 15, 16           |                      |
| 15                | 84.3, CH                               | 3.94, t (6.7)                                    | H-14                            | C-13, 14, 16, 17, 21, 32   |                      |
| 16                | 143.8, qC                              |                                                  |                                 |                            |                      |
| 17                | 119.4, CH                              | 6.76, overlap                                    | H-18                            | C-15                       |                      |
| 18                | 129.4, CH                              | 7.16, t (7.7)                                    | H-17, 19                        |                            |                      |
| 19                | 114.9, CH                              | 6.74, overlap                                    | H-18                            |                            |                      |
| 20                | 156.4, qC                              |                                                  |                                 |                            |                      |
| 21                | 113.5, CH                              | 6.79, m (2.0)                                    |                                 | C-15                       |                      |
| 22                | 13.7, CH <sub>3</sub>                  | 0.87, d (6.8)                                    |                                 | C-11, 12, 13               |                      |
| 23                | 17.9, CH <sub>3</sub>                  | 0.93, d (6.9)                                    | H-10                            | C-9, 10, 11                |                      |
| 24                | 28.6, CH <sub>3</sub>                  | 1.01, s                                          |                                 | C-1, 2, 3, 25              |                      |
| 25                | 24.3, CH <sub>3</sub>                  | 1.13, s                                          |                                 | C-1, 2, 3, 24              |                      |
| 26                | 22.3, CH <sub>3</sub>                  | 1.80, s                                          |                                 | C-3, C-4, C-5              |                      |
| 27                | 174.7, qC                              |                                                  |                                 |                            |                      |
| 28 $\alpha$       | 36.5, CH <sub>2</sub>                  | 2.74, overlap                                    | H-29, 28 $\beta$                | C-27, 29, 30               |                      |
| 28 $\beta$        |                                        | 2.91, dd (18.5, 6.4)                             | H-29, 28 $\alpha$               | C-27, 30                   | H-29, 30             |
| 29                | 72.0, CH                               | 5.47, ddd (6.2, 4.3, 1.6)                        | H-28 $\alpha$ , 28 $\beta$ , 30 | C-7, 27, 30                | H-28 $\beta$         |
| 30                | 79.1, CH                               | 4.72, ddd (13.0, 6.5, 4.3)                       | H-29, 31                        | C-29, 31                   | H-28 $\beta$         |
| 31                | 14.4, CH <sub>3</sub>                  | 1.37, d (6.5)                                    | H-30                            | C-29, 30                   |                      |
| -OCH <sub>3</sub> | 56.7, CH <sub>3</sub>                  | 3.18, overlap                                    |                                 | C-15                       |                      |

<sup>a</sup>Data recorded at 600 MHz. <sup>b</sup>Data recorded at 150 MHz.



**Figure S4.**  $^{13}\text{C}$  NMR (150 MHz) spectrum of **1** in  $\text{CDCl}_3$

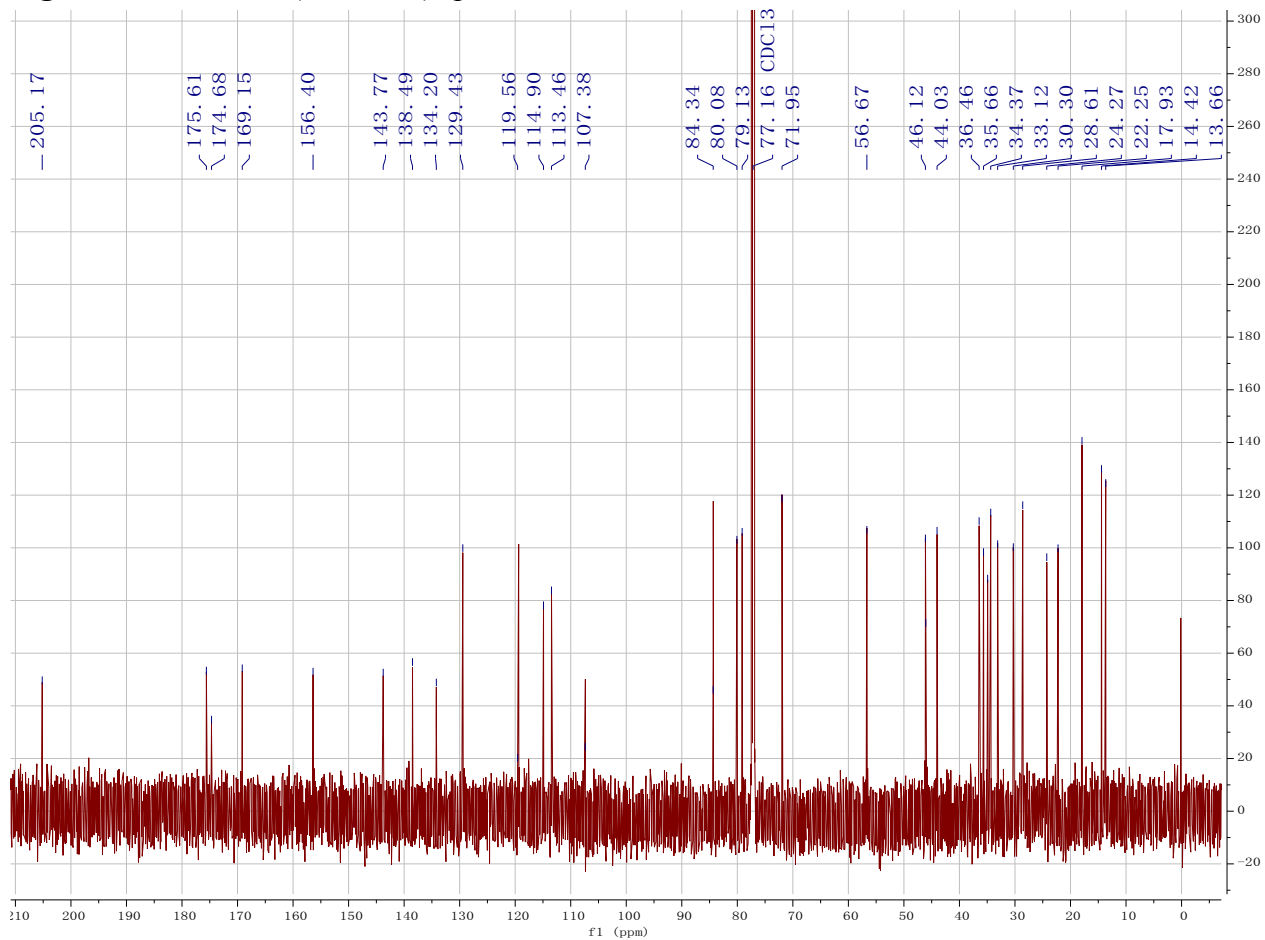

**Figure S5.** DEPT NMR spectrum (150 MHz) of **1** in CDCl<sub>3</sub>

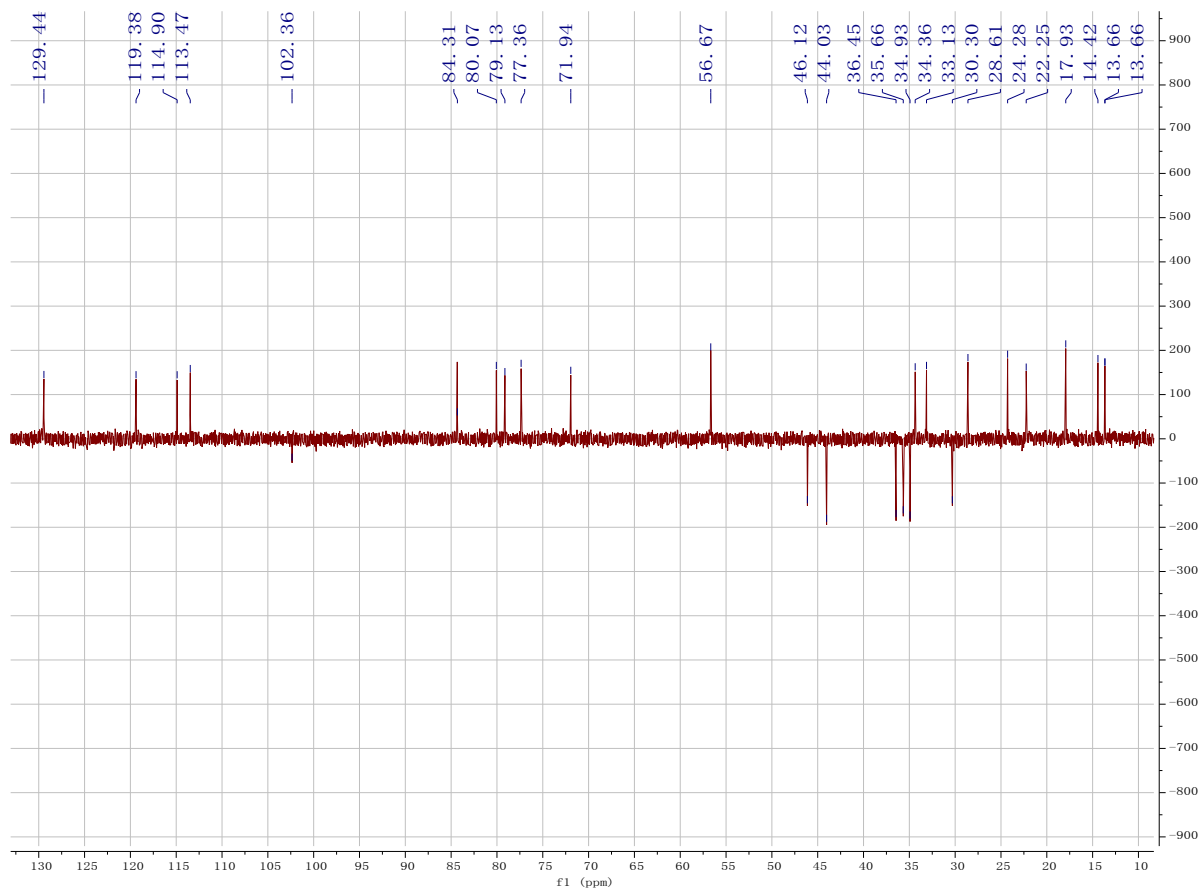

**Figure S6.** HSQC spectrum of **1** in CDCl<sub>3</sub>

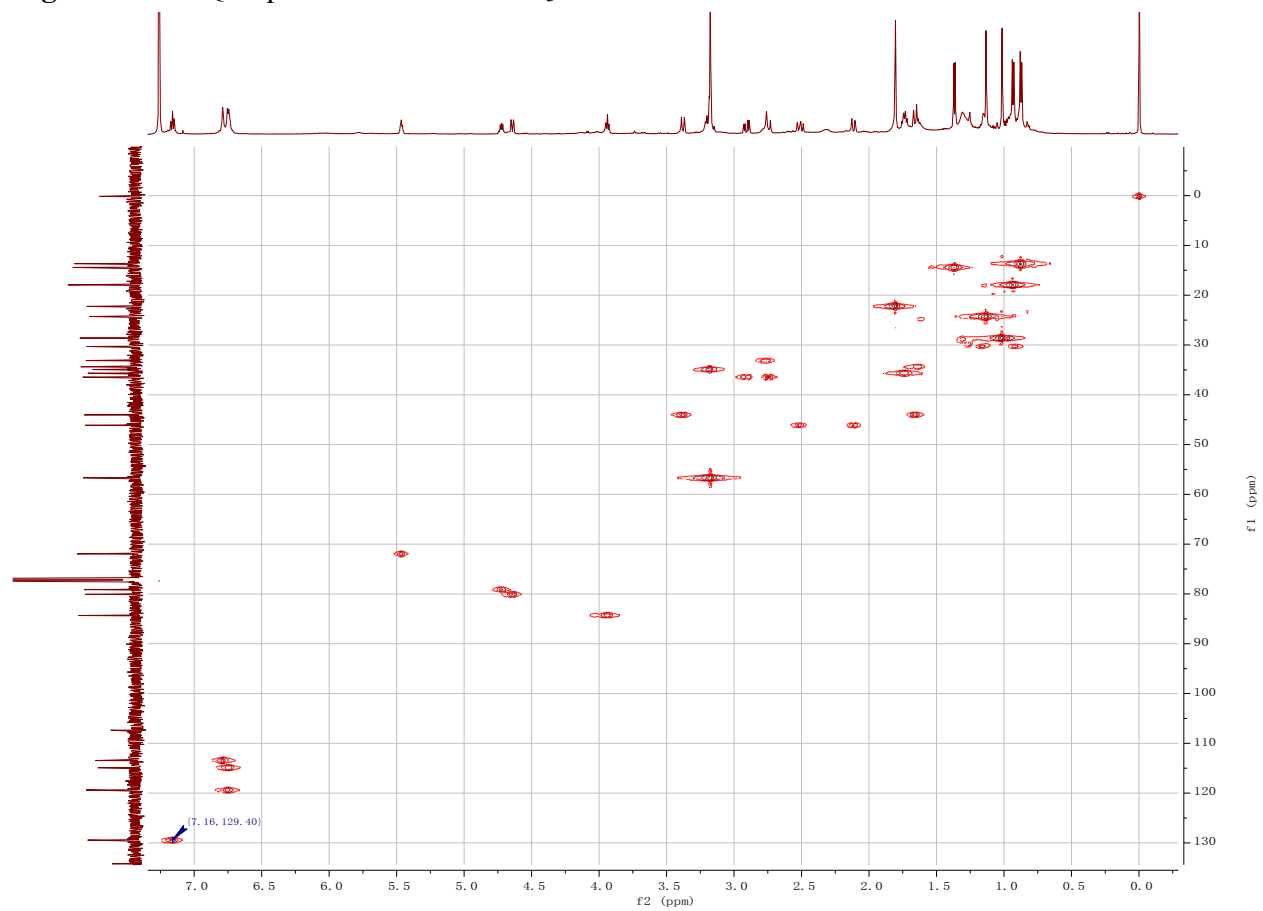

**Figure S7.** COSY spectrum of **1** in CDCl<sub>3</sub>

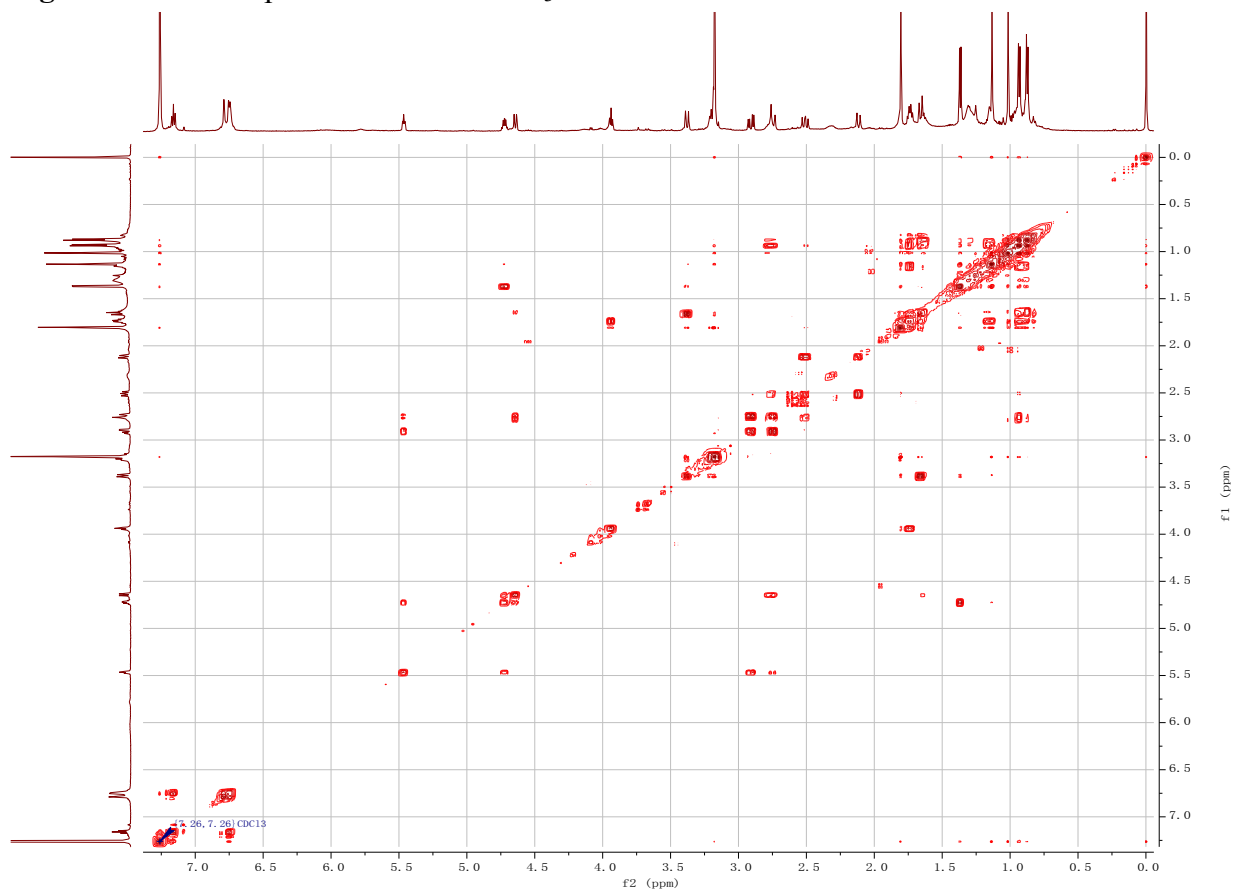

**Figure S8.** HMBC spectrum of **1** in CDCl<sub>3</sub>

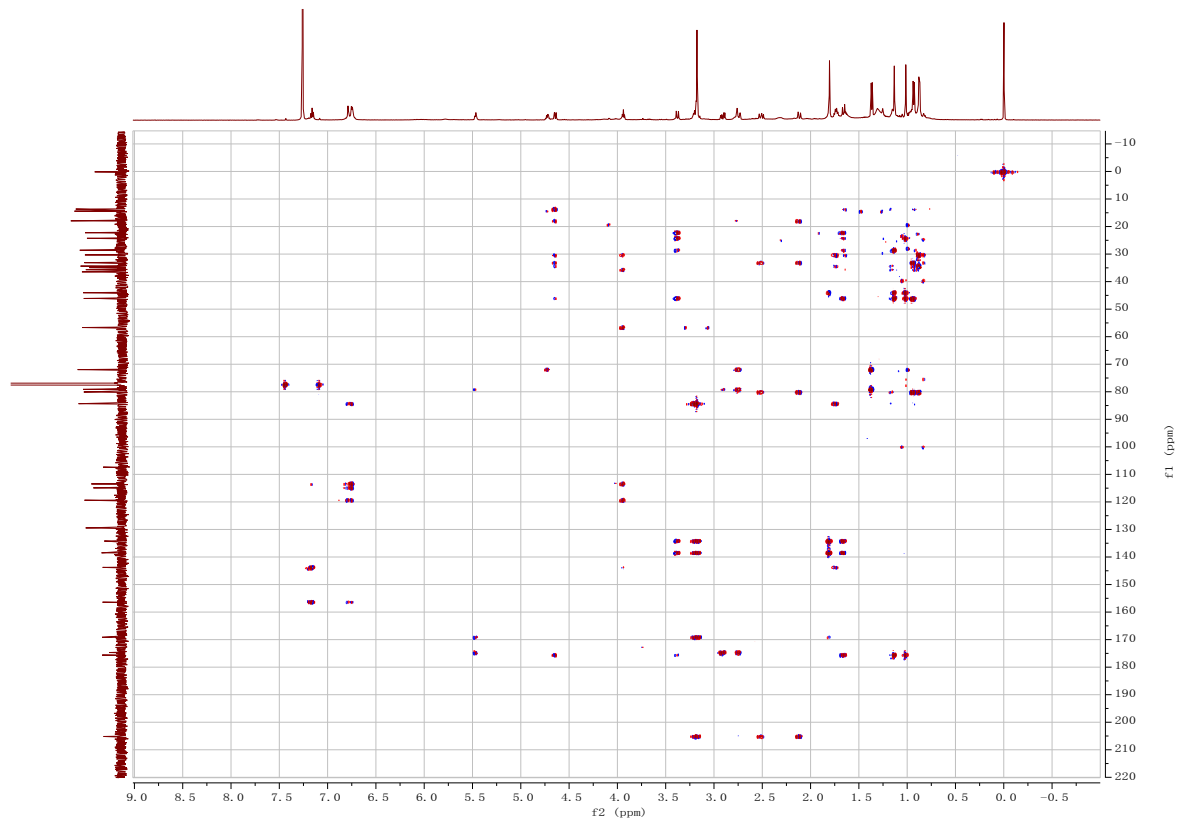

**Figure S9.** NOESY spectrum of **1** in CDCl<sub>3</sub>

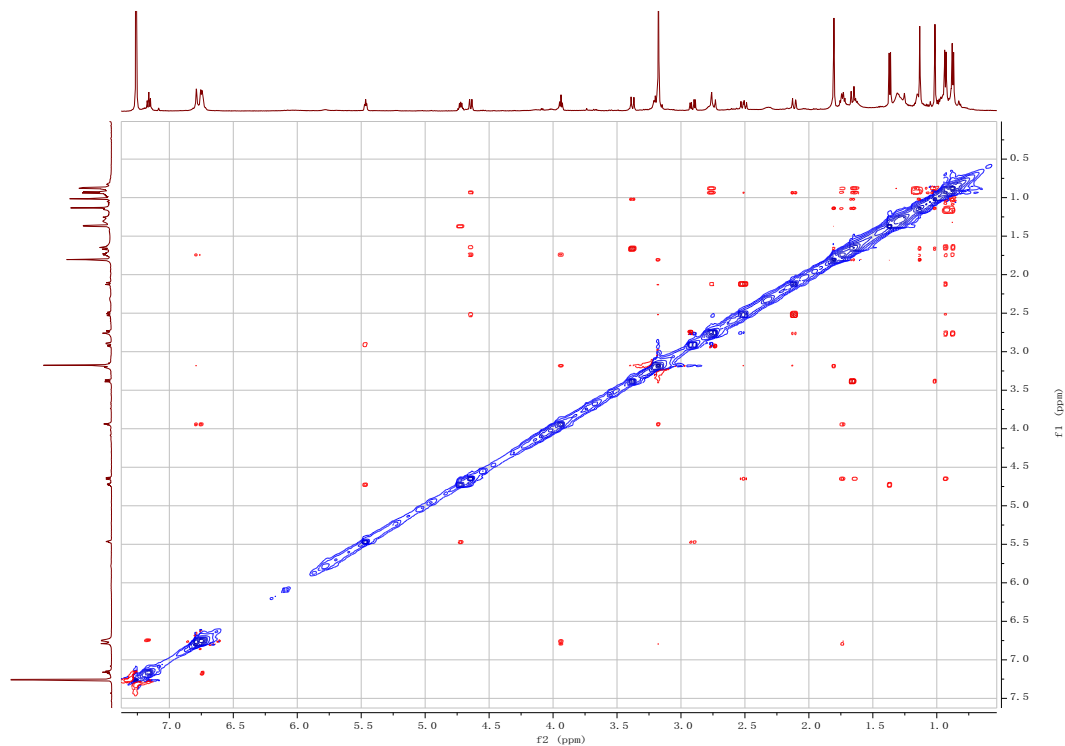

**Figure S10.** HRESIMS of **1**

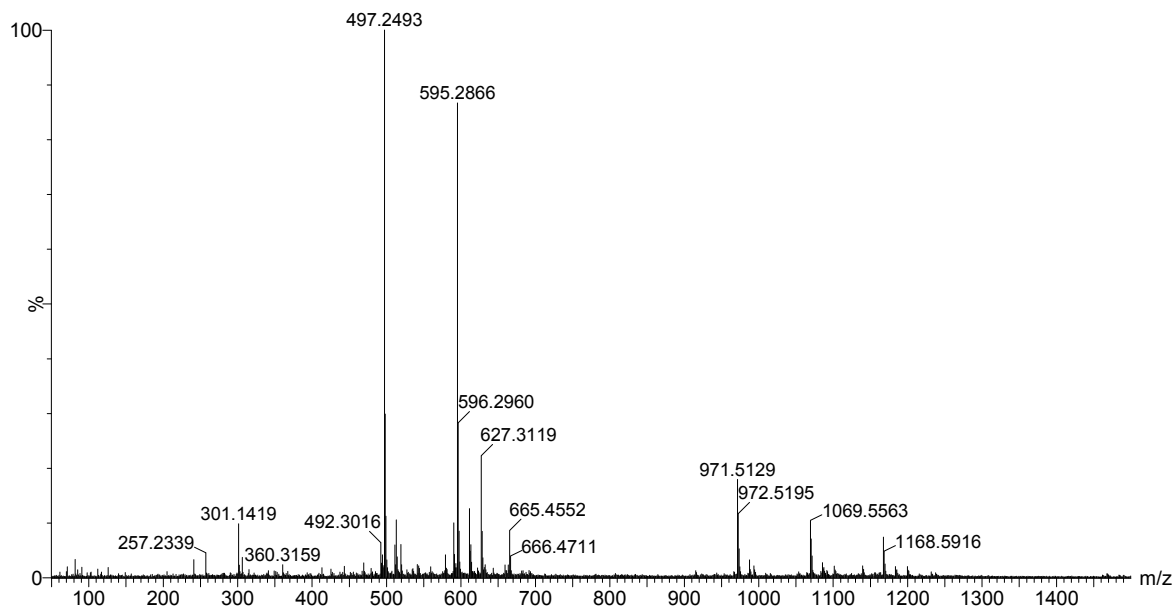

**Figure S11.**UV spectrum of **1**

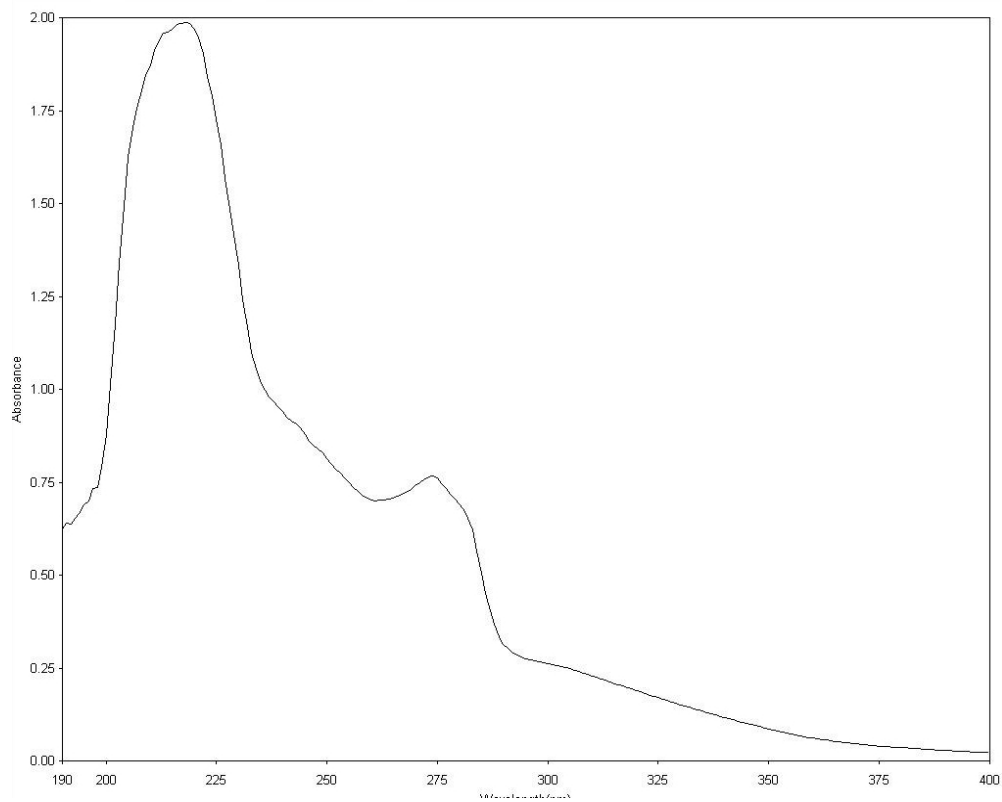

**Figure S12.** IR spectrum of **1**

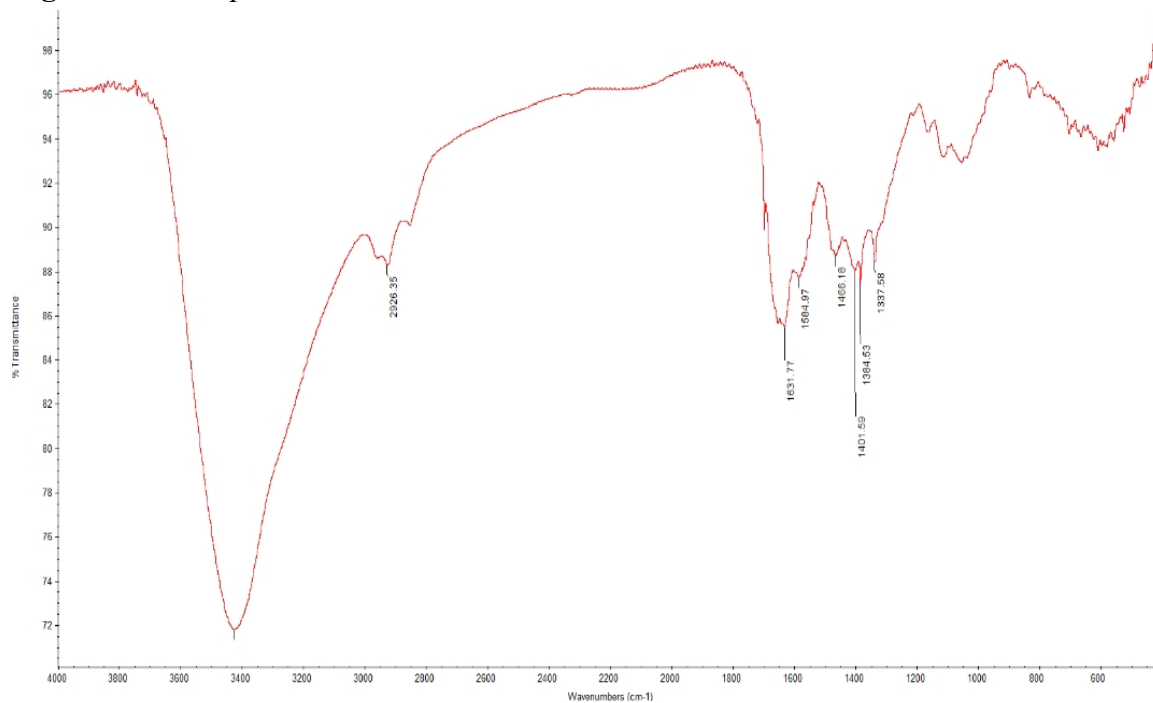

### Scheme S1. Plausible biosynthetic pathway of **1**

Neo-debromoaplysiatoxin C (**1**), contains a single 10-membered lactone ring core structure which, to the best of our knowledge, is the first example in ATXs. The plausible biosynthetic pathway of **1** was represented in Scheme 1. We postulated that the structural rearrangement of debromoaplysiatoxin was caused by the instability of the hemiketal at C-3 and ketal at C-7 in the presence of weak acids or alkalis, such as in the case of 30-methyloscillatoxin D and neo-debromoaplysiatoxin A-B. We envisioned that the ester linkage at C-27 was attacked by 30-OH and resulted in the formation of  $\gamma$ -lactone ring and 9-OH. A nucleophilic reaction between anionic C-8 and cationic C-3 accompanied by dehydration of C-3 and C-4 result the appearance of intermediate III. III subsequently experienced dehydration, hydration and oxidation, and finally neo-debromoaplysiatoxin C (**1**) was produced.

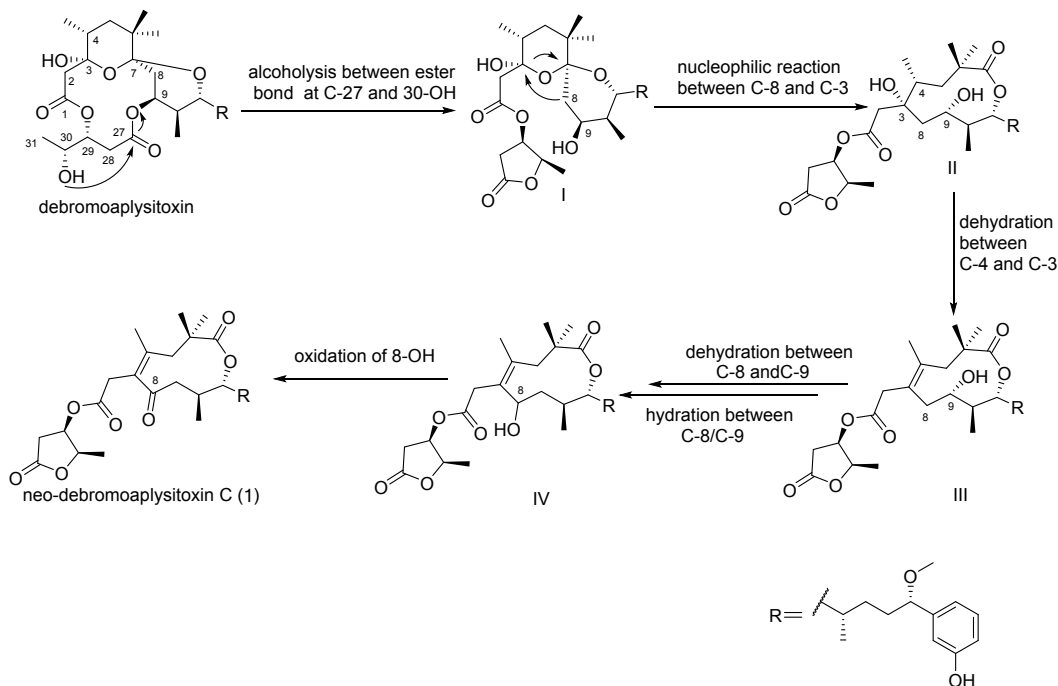

**Figure 13. Diagram of all energetically reasonable rotamers (staggered) for the C-11/C-12 and C-10/C-11**

The configuration of C-11 was assumed as *R*, the stereochemistry at C-12 and C-10 were defined using NOESY experiment and coupling constant in combination with a systematic analysis of all energetically reasonable (staggered) rotamers. The anti relationship of H-10 and H-11 and the gauche relationship of H-12 and H-11 were established from the coupling constants of H-11 ( $J=10.8, 1.0$  Hz) and the presence of NOESY correlation of H-11/H-12 and the absence of correlation between H-10 and H-11, which indicated  $J_{H-10, H-11}=10.8$  Hz and  $J_{H-11, H-12}=1.0$  Hz. The NOESY cross-peaks of H-11/H-12 and the small coupling constant of H-11/H-12 ( $J_{H-11, H-12}=1.0$ ) ruled out model A3 and B3, H-10/H<sub>3</sub>-22 ruled out model A1 and B3, H-12/H<sub>3</sub>-23 ruled out A2 and B2. Model B1 full all criteria for C-11/C-12. The large coupling constant of H-10 and H-11 ( $J_{H-10, H-11}=10.8$ ) ruled out C1, C2, D1 and D2, the NOESY correlations from H-11 to H<sub>3</sub>-23 ruled out C2 and D1, H-10/H<sub>3</sub>-22 ruled out C1 and D1, H<sub>3</sub>-23/H-12 ruled out model C3 and D2. Model D3 full all criteria for C-11/C-10. Thus, indicated a 10*S*\*, 11*R*\*, 12*S*\* configuration for neo-debromoaplysiatoxin C (**1**)

11*R*, 12*R*

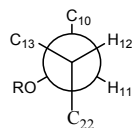

A1

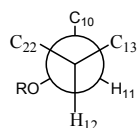

A2

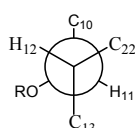

A3

11*R*, 12*S*

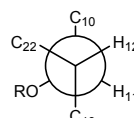

B1

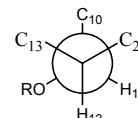

B2

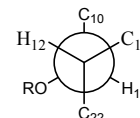

B3

11*R*, 10*R*

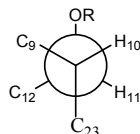

C1

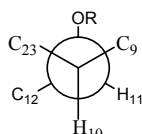

C2

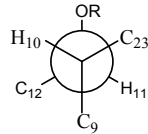

C3

11*R*, 10*S*

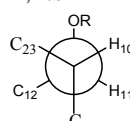

D1

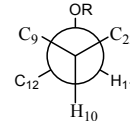

D2

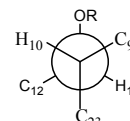

D3
